# Supplementary material for: Correlation between the electronic structure, topologic structure and dynamic properties of liquid cerium
Source: Royal Society of Chemistry journal article supplement (doi:10.1039/c7cp05810a), 2017-01-01
Supplement: c7cp05810a1.pdf [file c7cp05810a1.pdf]

# Electronic Supplementary Information

## Correlation between the Electronic Structure, Topologic Structure and Dynamic Properties of Liquid Ce

Xiaorui Sun, Rulong Zhou\*, and B. Zhang\*

*Institute of Amorphous Matter Science, School of Materials Science and Engineering, Hefei*

*University of Technology, Hefei, Anhui 230009, P. R. China*

Emails: rlzhou@hfut.edu.cn; [bo.zhang@hfut.edu.cn](mailto:bo.zhang@hfut.edu.cn)

### 1. Methods

**Radial distribution function.** The normalized total radial distribution function (TRDF) and partial radial distribution functions (PRDFs) are defined as:

$$g(r) = \frac{V}{N^2} \left\langle \sum_i^N \frac{h_{ij}}{4\pi r^2 \Delta r} \right\rangle \quad (1)$$

$$g_i(r) = \frac{V}{N^2} \left\langle \sum_{j=1}^{N_i} \frac{h_{ij}}{4\pi r^2 \Delta r} \right\rangle \quad (2)$$

Where  $V$  is the volume of the simulation supercell;  $N$  is the total number of atoms in the supercell;  $N_i$  is the number of the atoms of  $i$  species;  $h_{ij}$  is the number of atoms of  $j$  species which locate in the spherical shell with radius from  $r$  to  $r + \Delta r$  around an atom of  $i$  species.  $g(r)$  is the normalized total radial distribution function;  $g_i(r)$  is the partial radial distribution function of  $i$  specie atoms.

**Chemical order parameter.** Chemical short range order (CSRO) is described in terms of the micro-chemical inhomogeneity (MCI) parameter  $\xi$  which can be used to reflect the CSRO's quantitatively of a binary system as well as for a general multi-component system. The MCI parameter of the component  $i$ ,  $\xi_i$  and the MCI parameter of the system  $\xi$ , are defined respectively as

follows:

$$\xi_i = CN_{ii} - \frac{1}{N-1} \sum_{j \neq i}^N CN_{ji} \quad (3)$$

$$\xi = \sum_i c_i \cdot \xi_i \quad (4)$$

Where  $CN_{ji}$  is the number of atoms of  $j$  species around an atom of  $i$  species, and  $c_i$  is the concentration of  $i$  species. For a system with a positive MCI parameters  $\xi$ , it has a tendency to undergo segregation or phase separation at those compositions, since atoms prefer to have atoms of similar species as their neighbors. In a system with negative MCI parameters  $\xi$ , there is a preference for each atom to have distinct atoms as neighbors.

**Diffusion coefficient.** The diffusion coefficient is defined as:

$$D_j = \frac{\left\langle \sum_{i=1}^{N_j} [r_i(t) - r_i(0)]^2 \right\rangle}{6N_j t} \quad (5)$$

Where  $N_j$  is the number of the  $j$ -th kind of Ce atoms,  $r_i(0)$  and  $r_i(t)$  are the position of  $i$ -th atom at the start and end of the interval  $t$ . Since different kinds of Ce are interchangeable during the structure evolution, it is challenging to calculate the diffusion coefficient for each kind of Ce. In our calculation, a Ce atom is considered as a larger-magnetic-moment one if its average magnetic moment is larger than  $0.6 \mu_B$  in 2 ps, otherwise it is considered as a smaller-magnetic-moment Ce atom.

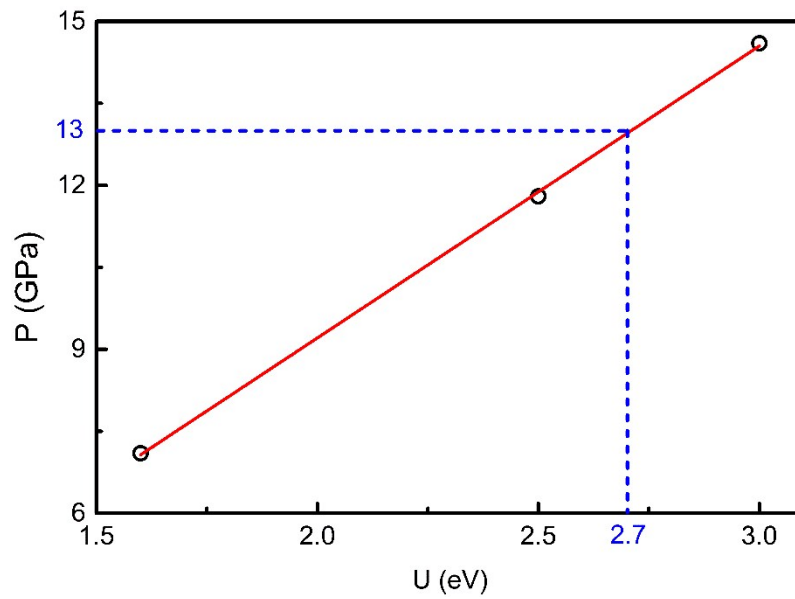

**Figure S1 | The external pressure changes with U at fixed volume.** Here, we calculate the pressure with different U at fixed volume which 14% larger than the HDL phase at 13 GPa and 1550 K. The U=2.7 eV are derived by liner interpolation method as illustrated in figure S1.

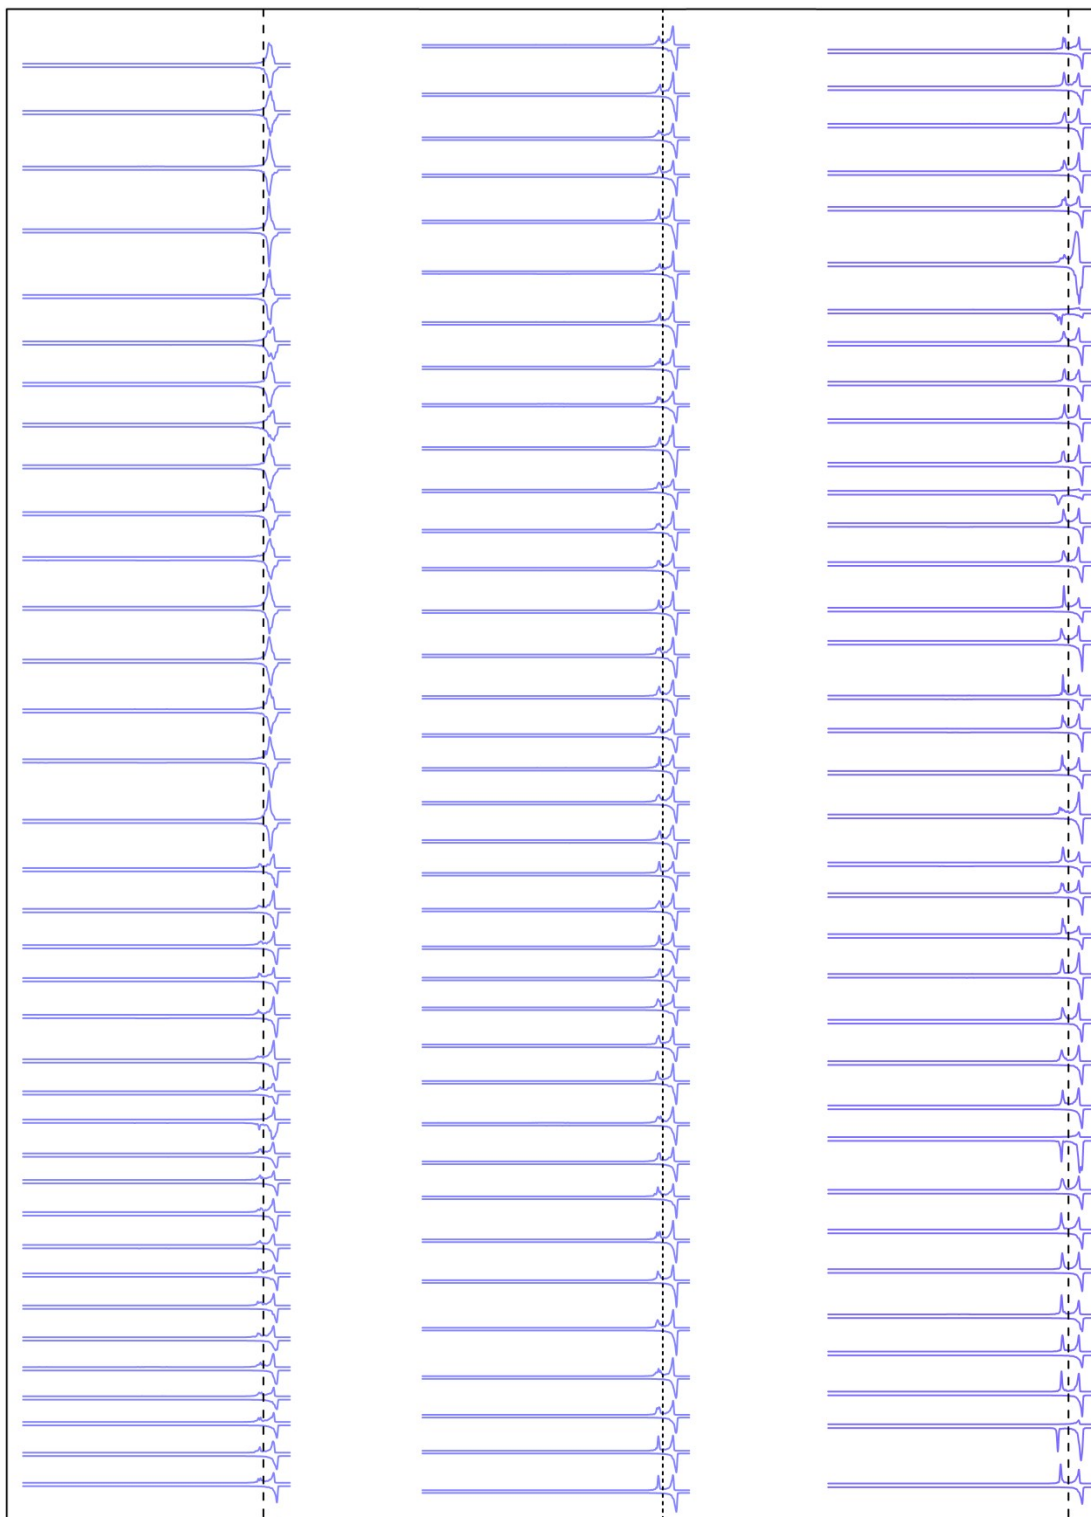

**Figure S2** | Each atomic f-PDOS of the given structure for LDL Ce.

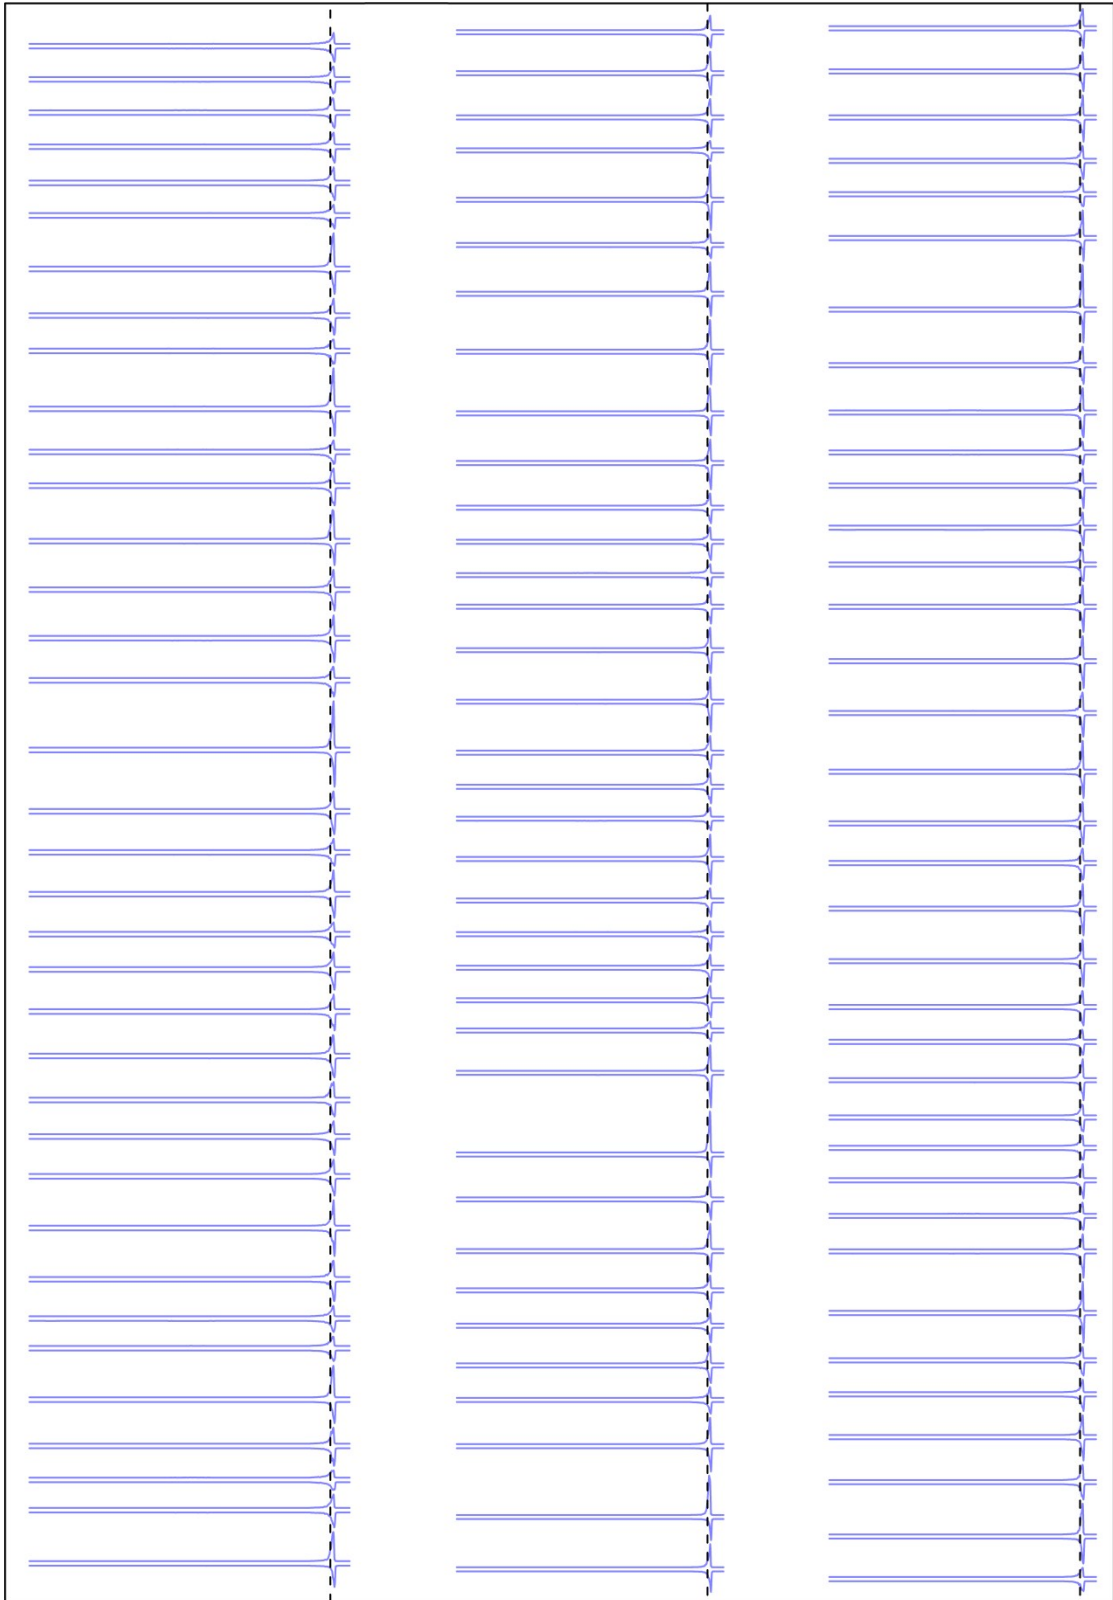

**Figure S3** | Each atomic f-PDOS of the given structure for HDL Ce.

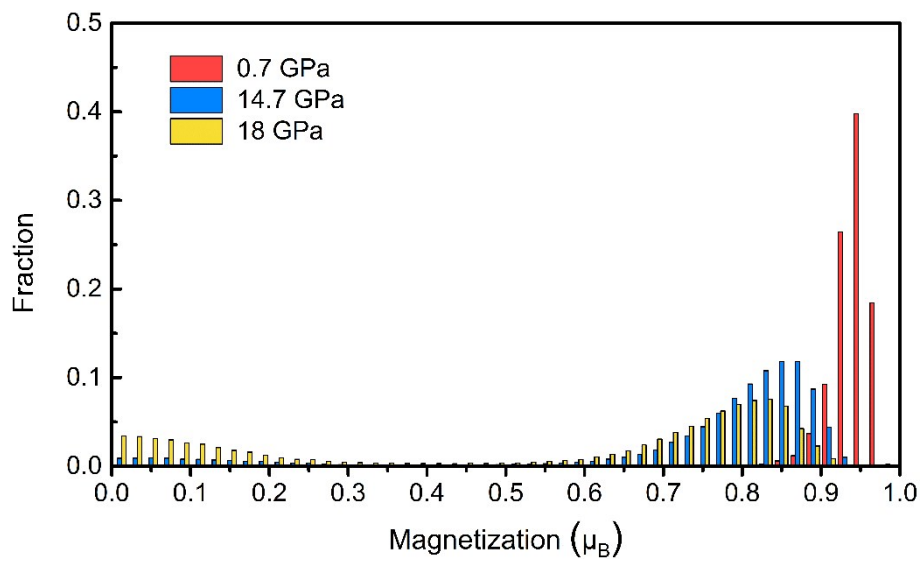

**Figure S4** | Atomic magnetic moment changes with pressure in LDL phase at 1900 K.

## **Supplemental video**

For clarity, yellow represents the smallest 15 local magnetic moments of Ce atoms, whereas the other atoms represent the larger-magnetic-moment ones. From the video, we see it visually that Ce atoms with similar degree of 4f-electron-locality tend to gather together.
